# Supplementary material
Source: PubMed Central journal article supplement (PMC2720147)
Supplement: supp_178_11_1164__1.pdf [file supp_178_11_1164__1.pdf]

**Smoking-Related Genomic Signatures in Non-Small Cell Lung Cancer**

Pierre P. Massion, Yong Zou, Heidi Chen, Aixiang Jiang, Peter Coulson, Christopher I. Amos, Xifeng Wu, Ignacio Wistuba, Qingyi Wei, Yu Shyr and Margaret R. Spitz

Online Data Supplement

Supplement Figure 1.

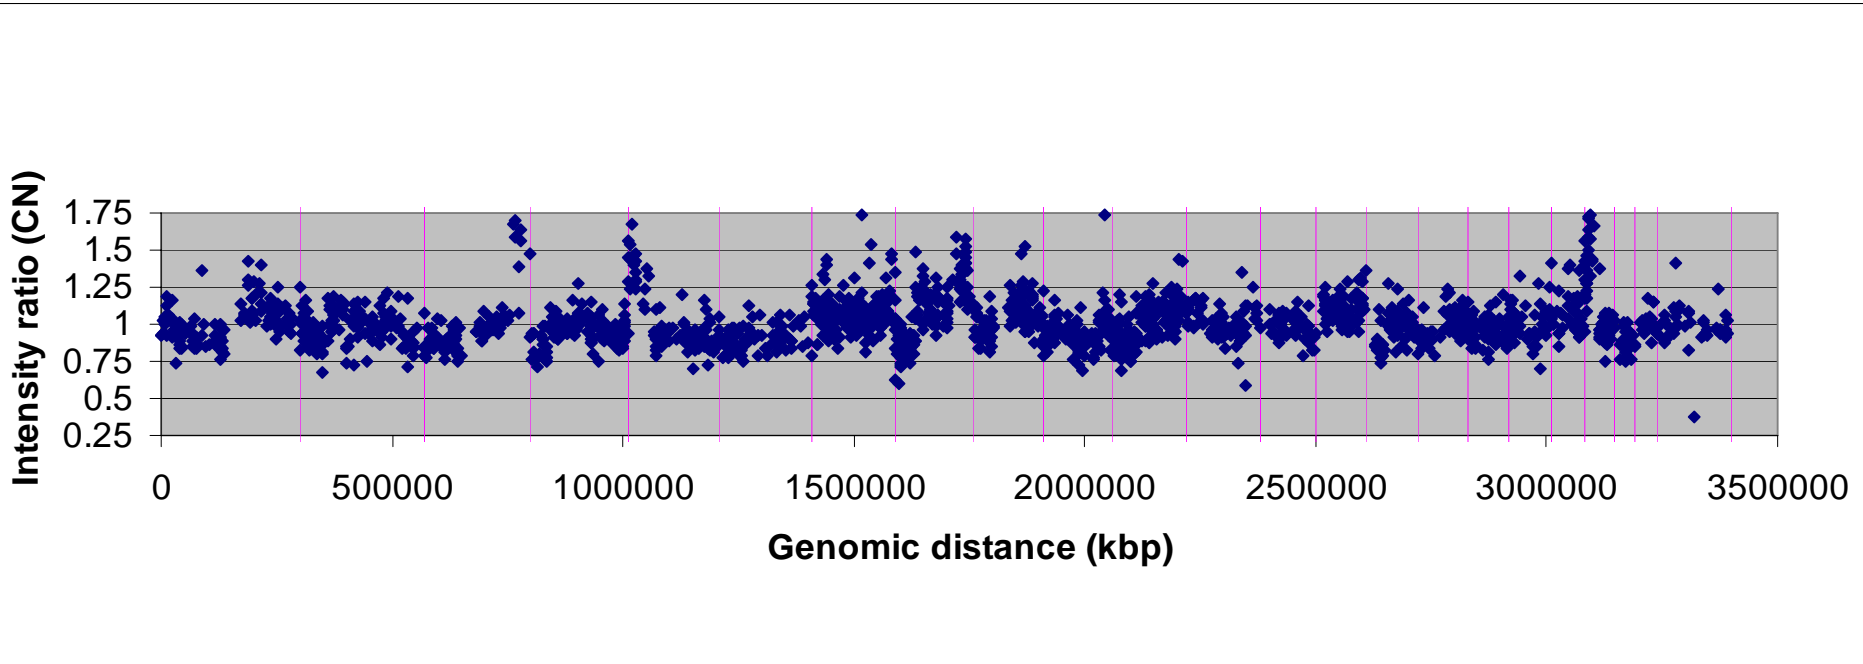

Array CGH analysis. Representative genomic profile of a squamous carcinoma of the lung tested against sex-matched normal DNA. Chromosomal boundaries are indicated by vertical lines. Genomic distances are presented in kbp. Each data point is presented as mean of 3 analytical replicates.

# Supplement Figure 2.

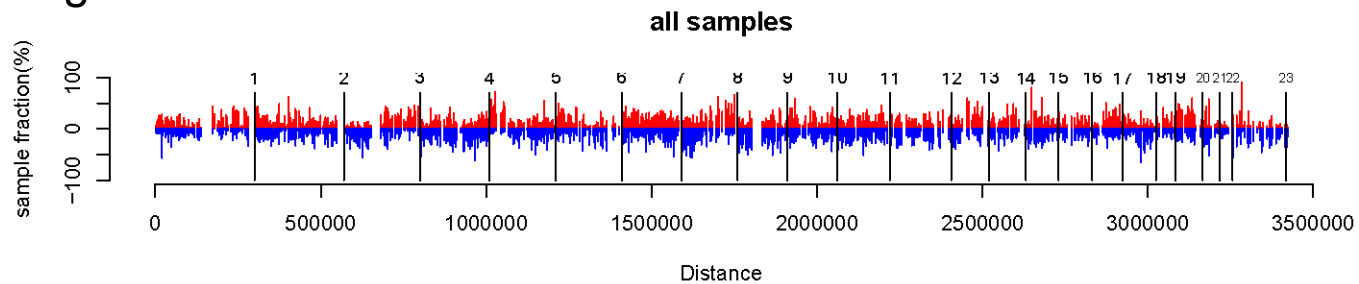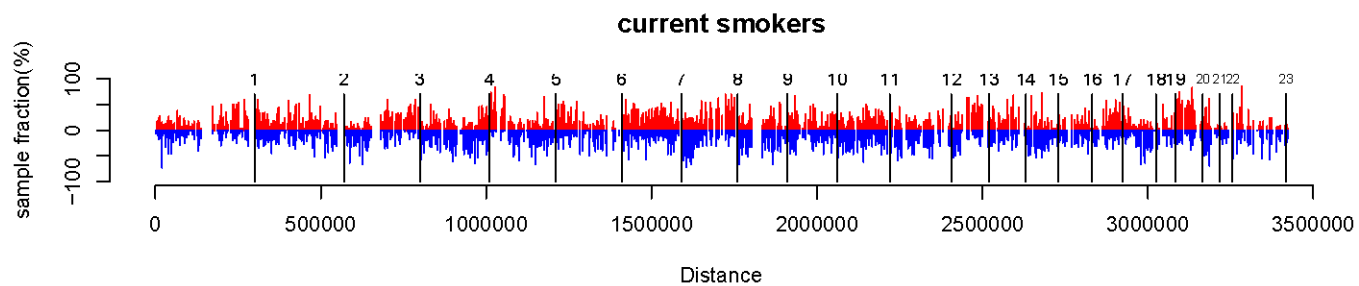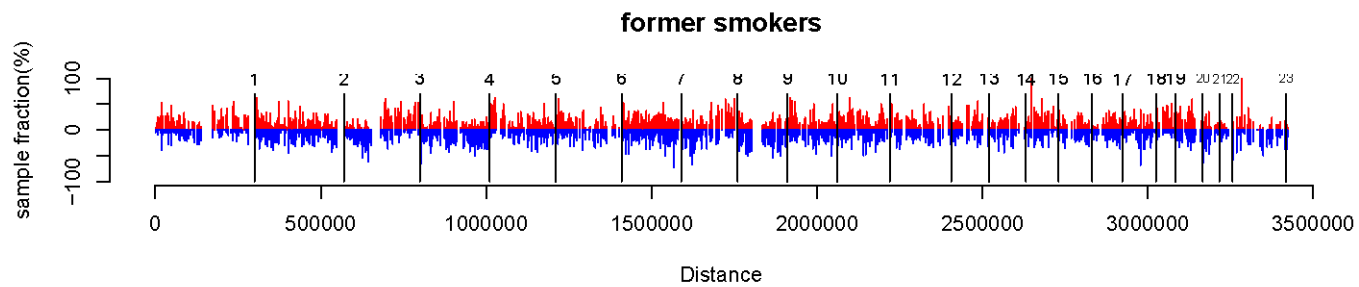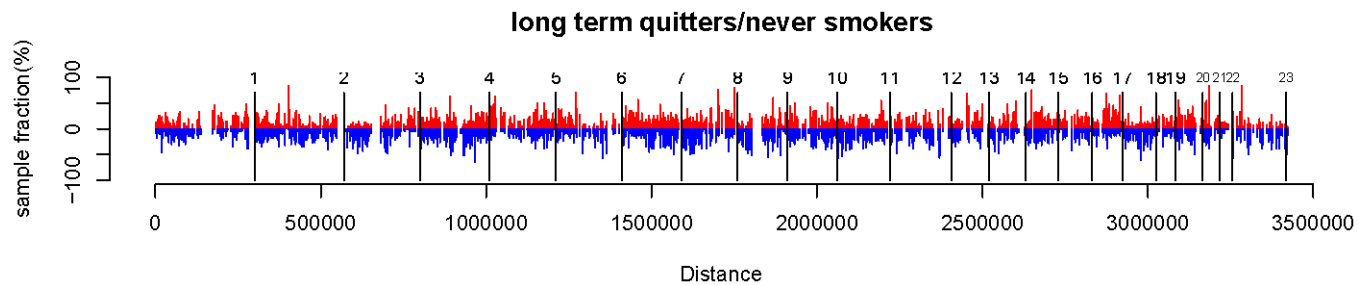

Supplement Table 1. Average Variability across BAC clones by Smoking status.

| Genomic Alteration | Smoking Status | Average Variability ( %) | SD    | P-values for pairwise comparison between smoking status |         |         |
|--------------------|----------------|--------------------------|-------|---------------------------------------------------------|---------|---------|
|                    |                |                          |       | 1 vs 2                                                  | 1 vs 3  | 2 vs 3  |
| Amplification      | 1              | 14.9                     | 14.46 | < 0.001                                                 | < 0.001 |         |
|                    | 2              | 12.7                     | 12.22 |                                                         |         | < 0.001 |
|                    | 3              | 12.0                     | 11.39 |                                                         |         |         |
| Deletion           | 1              | 14.9                     | 13.37 | < 0.001                                                 | < 0.001 |         |
|                    | 2              | 12.1                     | 11.06 |                                                         |         | 0.271   |
|                    | 3              | 12.4                     | 11.13 |                                                         |         |         |
| No Gain or Loss    | 1              | 71.5                     | 18.27 | < 0.001                                                 | < 0.001 |         |
|                    | 2              | 76.2                     | 16.37 |                                                         |         | 0.058   |
|                    | 3              | 76.6                     | 16.06 |                                                         |         |         |

Note : P-values were calculated from permutation test of Wilcoxon signed-rank test.  
 Group 1, current smoker; 2, former smokers; 3, never smokers and long term quitters.

| Supp Table 2. Candidate genes within genomic regions associated smoking history in lung cancer. |              |     |                  |                      |                      |                               |                                                                                                                                                  | smk1vs3 | smktrend | pky | FDR   |
|-------------------------------------------------------------------------------------------------|--------------|-----|------------------|----------------------|----------------------|-------------------------------|--------------------------------------------------------------------------------------------------------------------------------------------------|---------|----------|-----|-------|
| # BACs                                                                                          | BAC clone ID | CHR | FISH             | Gain/Loss in Smokers | Closest Fragile site | 300kb surrounding region      | Candidate genes                                                                                                                                  |         |          |     |       |
| 1                                                                                               | RP11-137M19  | 1   | 1q21-22          | Gain                 | 1q21                 | chr1:155,796,124-156,096,124  | CD5L, DARC, CADM3, AIM2, FCRL1, FCRL2, FCRL3, FCRL4                                                                                              |         | X        |     | 0.033 |
| 2                                                                                               | RP11-4J2     | 1   | 1q23             | Gain                 | 1q21                 | chr1:173,869,989-174,169,989  | TNR, ASTN, FAM5B                                                                                                                                 | X       | X        |     | 0.018 |
| 3                                                                                               | RP11-67G7    | 2   | 2q32.1           | Gain                 | 2q32.1               | chr2:182,730,708-183,030,708  | PDE1A, PPP1R1C                                                                                                                                   |         | X        |     | 0.031 |
| 4                                                                                               | RP11-71H20   | 2   | 2q36-2q37        | Loss                 | 2q37.3               | chr2:231,915,417-232,215,417  | C2orf57, NMUR1, C2orf52, NCL, B3GNT7, ARMC9                                                                                                      | X       | X        |     | 0.019 |
| 5                                                                                               | RP4-690P14   | 3   | 3p21.31          | Loss                 | 3q24                 | chr3:49,200,725-49,500,725    | DAG1, NICN1, AMT, TCTA, RHOA, GPX1, USP4, C3orf62, CCDC36, LOC646498                                                                             |         | X        |     | 0.031 |
| 6                                                                                               | CTB-110J24   | 3   | 3p25-p26         | Loss                 | 3p24.2               | chr3:10,012,960-10,312,960    | GHRL, TATDN2, IRAK2, VHL, C3orf10, C3orf24, FANCD2, LOC401052                                                                                    |         | X        |     | 0.024 |
| 7                                                                                               | RP11-220G20  | 3   | 3q13.3           | Gain                 | 3q13.2               | chr3:118,554,507-118,854,507  |                                                                                                                                                  | X       | X        |     | 0.033 |
| 8                                                                                               | RP11-59J16   | 3   | 3q21             | Gain                 | 3p24                 | chr3:128,525,760-128,825,760  | MCM2, GPR175                                                                                                                                     | X       | X        |     | 0.024 |
| 9                                                                                               | RP11-166D18  | 3   | 3q23             | Gain                 | 3q25                 | chr3:140,869,489-141,169,489  | CLSTN2, NMNAT3                                                                                                                                   |         |          | X   | 0.03  |
| 10                                                                                              | RP11-203L15  | 3   | 3q25-3q26.1      | Gain                 | 3q25                 | chr3:161,851,141-162,151,141  | PPM1L, ARF7, TRIM59, KPNA4, SMC4, PPM1L                                                                                                          | X       | X        | X   | 0.017 |
| 11                                                                                              | RP11-118C24  | 4   | 4p15.2           | Loss                 | 4p15                 | chr4:25,106,258-25,406,258    | KIAA0746, ANAPC4, SLC34A2                                                                                                                        | X       | X        |     | 0.024 |
| 12                                                                                              | CTD-2224I19  | 4   | 4p16.3           | NA                   | 4p16.1               | chr4:1,722,829-2,022,829      | WHSC2, WHSC1, LETM1, FGFR3                                                                                                                       |         |          | X   | 0.042 |
| 13                                                                                              | RP11-203L17  | 4   | 4q35.2           | Loss                 | 4q31.1               | chr4:186,566,474-186,866,474  | SORBS2, C4orf20, ANKRD37, LRP2BP, SNX25, PDLIM3, CCDC110, LOC441054, UFSP2                                                                       |         | X        |     | 0.024 |
| 14                                                                                              | CTD-2006C10  | 5   | 5q12             | Loss                 | 5q15                 | chr5:64,746,411-65,046,411    | SGTB, C5orf44, TRIM23, PPWD1, CENPK, ADAMTS6                                                                                                     | X       | X        |     | 0.029 |
| 15                                                                                              | CTD-2113P14  | 5   | 5q13.1           | Loss                 | 5q15                 | chr5:68,354,015-68,654,015    | CCDC125, CDK7, MRPS36, CENPH, CCNB1, SLC30A5                                                                                                     |         |          | X   | 0.03  |
| 16                                                                                              | CTD-2113L13  | 5   | 5q31             | Loss                 | 5q31.1               | chr5:137,680,991-137,980,991  | JMJD1B, REEP2, ETF1, EGR1, FAM53C, CDC25C, GFRA3, CDC23, KIF20A, BRD8, NME5                                                                      | X       | X        | X   | 0.002 |
| 17                                                                                              | CTD-2262N19  | 5   | 5q34             | Loss                 | 5q35                 | chr5:176,338,823-176,638,823  | NSD1, FGFR4, ZNF346, UIMC1                                                                                                                       | X       | X        |     | 0.002 |
| 18                                                                                              | RP11-51D11   | 5   | 5q35             | Loss                 | 5q35                 | chr5:178,962,744-179,262,744  | TBC1D9B, HNRPH1, C5orf45, SQSTM1, MGAT4B, LTC4S, MAML1, CANX, HNRNP11, RUFY1                                                                     |         | X        |     | 0.022 |
| 19                                                                                              | RP11-52M17   | 7   | 7p13             | Loss                 | 7p13                 | chr7:44,223,496-44,523,496    | NPC1L1, OGDH, TMED4, DDX56, LOC644907, NUDCD3, CAMK2B                                                                                            |         | X        |     | 0.034 |
| 20                                                                                              | CTB-51J22    | 7   | 7q11.23c         | Loss                 | 7q11                 | chr7:72,754,023-73,054,023    | WBSCR28, EIF4H, ELN, LIMK1, WBSCR27, CLDN4, CLDN3, ABHD11, STX1A                                                                                 |         | X        |     | 0.024 |
| 21                                                                                              | CTC-332K22   | 7   | 7q11.23f-q11.23g | Loss                 | 7q11                 | chr7:75,487,089-75,787,089    | HSPB1, ZP3, SRCRB4D, YWHAG, HSBP1, FLJ37078, MDH2, STYXL1                                                                                        |         | X        |     | 0.022 |
| 22                                                                                              | GS1-216H24   | 7   | 7qtel            | Gain                 | 7q36                 | chr7:158,580,712-158,880,712  |                                                                                                                                                  |         |          | X   | 0.039 |
| 23                                                                                              | RP11-262B7   | 8   | 8p23.1           | Loss                 | 8p23.1               | chr8:11,600,294-11,900,294    | DEFB134, DEFB136, DEFB137, CTBS, FDT1, NEIL2, GATA4                                                                                              | X       | X        |     | 0.002 |
| 24                                                                                              | RP11-24C23   | 8   | 8q24.1           | Gain                 | 8q24.1               | chr8:118,887,013-119,187,013  | EXT1                                                                                                                                             |         | X        |     | 0.033 |
| 25                                                                                              | CTD-2280C3   | 9   | 9q34.2           | Loss                 | 9q32                 | chr9:129,514,573-129,814,573  | FAM102A, FNBP1, USP20, TOR1A, TOR1B, PTGES, PRRX2, DPM2, PIP5K1L1, ST6GALNAC4, ST6GALNAC6, AK1, ENG, FPGS, CDK9, SH2D3C, TOR2A, TTC16, PTRH1, C9 |         | X        |     | 0.027 |
| 26                                                                                              | RP11-56E13   | 11  | 11p11.2          | Loss                 | 11p13                | chr11:47,898,976-48,198,976   | OR4B1, PTPRJ                                                                                                                                     |         | X        |     | 0.033 |
| 27                                                                                              | RP11-548G17  | 11  | 11q13.1          | Loss                 | 11q13.1              | chr11:64,403,628-64,703,628   | SPDYC, SYVN1, MRPL49, FAU, ZNHIT2, TM7SF2, C11orf2, ZFPL1, CDCA5, NAALADL1, SAC3D1, SNX15, ARL2, BATF2, LOC283129, GPHA2, PPP2R5B, ATG2A         |         | X        |     | 0.031 |
| 28                                                                                              | CTD-2042H22  | 12  | 12q13.3          | Loss                 | 12q13.1              | chr12:54,621,777-54,921,777   | ANKRD52, SLC39A5, OBF2C2, RNF41, SMARCC2, MYL6, MYL6B, FAM62A, ZC3H10, RPL41, PA2G4, ERBB3, LOC728937, RPS26, IKZF4, SUOX, RAB5B, CDK2, S        | X       | X        |     | 0.002 |
| 29                                                                                              | CTD-227E11   | 15  | 15q22.1          | Loss                 | 15q22.1              | chr15:89,125,326-89,425,326   | VPS33B, PRC1, RCCD1, HDDC3, UNC45A, MAN2A2, FES, FURIN, BLM                                                                                      | X       | X        | X   | 0.002 |
| 30                                                                                              | GS-127C11    | 16  | 16p13.11         | Loss                 | 16p13.11             | chr16:15,992,749-16,292,749   | NOMO3, ABCC6, ABCC1                                                                                                                              |         |          | X   | 0.03  |
| 31                                                                                              | RP11-253O10  | 16  | 16q23            | Loss                 | 16q23.2              | chr16:73,951,276-74,251,276   | TERF2IP, KARS, ADAT1, GABARAPL2, FLJ22167, CHST5, CHST6, TMEM170A, CFDP1                                                                         | X       | X        | X   | 0.022 |
| 32                                                                                              | CTB-110Z3    | 17  | 17p13.3          | Loss                 | 17p13.3              | chr17:2,530,493-2,830,493     | GARNL4, KIAA0664, PAFAH1B1                                                                                                                       |         | X        |     | 0.019 |
| 33                                                                                              | GS-64G5      | 17  | 17p13.3          | Loss                 | 17p12                | chr17:2,084,568-2,384,568     | METT10D, RUTBC1, LOC284009, MNT, SGSM2, TSR1, SRR, SMG6                                                                                          |         | X        |     | 0.033 |
| 34                                                                                              | RP5-1073F15  | 17  | 17q23.2          | Loss                 | 17q23.1              | chr17:55,203,895-55,503,895   | HEATR6, RNFT1, RPS6KB1, TUBD1, TMEM49                                                                                                            |         | X        |     | 0.033 |
| 35                                                                                              | CTD-164O19   | 19  | 19p13.2          | Loss                 | 19p13                | chr19:10,833,279-11,133,279   | DOCK6, SPBC24, KANK2, SPC24, LDLR, SMARCA4, C19orf52, YIPF2, CARM1                                                                               |         | X        |     | 0.016 |
| 36                                                                                              | RP11-17I20   | 19  | 19q13.3          | Loss                 | 19q13                | chr19:53,707,778-54,007,778   | BCAT2, FGF21, FUT1, IZUMO1, RASIP1, FLJ36070, FUT2, LOC126147, CA11, DBP, SPHK2, RPL18, SPACA4, FAM83E, SULT2B1, LMTK3                           |         | X        |     | 0.019 |
| 37                                                                                              | RP11-87L13   | 19  | 19q13.4          | Loss                 | 19q13                | chr19:60,575,384-60,875,384   | U2AF2, CCDC106, ZNF581, ZNF580, ZNF784, ZNF524, FIZ1, ZNF579, LOC646643, NAT14, ZNF628, ISOC2, UBE2S, RPL28, TMEM190                             |         | X        |     | 0.027 |
| 38                                                                                              | CTD-2042A23  | 20  | 20q12            | NA                   | 20p11.23             | chr20:39,094,426-39,394,426   | ZHX3, PLCG1, TOP1                                                                                                                                |         |          | X   | 0.03  |
| 39                                                                                              | CTD-2236H16  | 23  | Xq22.1           | Loss                 | Xq22.1               | chrX:100,480,943-100,780,943  | ARMCX3, ARMCX6, ARMCX1, HNRNP28, GLA, RPL36A, BTK, TIMM8A                                                                                        | X       |          |     | 0.048 |
| 40                                                                                              | RP11-102O20  | 18  | 18p11.22         | NA                   | 18q12.2              | chr18:9,868,595-10,168,595    | VAPA, TXNDC2                                                                                                                                     | X       |          |     | 0.048 |
| 41                                                                                              | RP11-105C15  | 18  | 18p11.31         | Gain                 | 18q12.2              | chr18:5,837,092-6,137,092     | L3MBTL4, TTMA                                                                                                                                    | X       |          |     | 0.048 |
| 42                                                                                              | RP11-123E5   | 7   | 7p21.1           | Loss                 | 7p22                 | chr7:17,471,664-17,771,664    |                                                                                                                                                  | X       |          |     | 0.048 |
| 43                                                                                              | RP11-127F3   | 7   | 7q21.3           | NA                   | 7q21.2               | chr7:94,810,748-95,110,748    | PDK4, ASB4, PON2, PON3                                                                                                                           | X       |          | X   | 0.048 |
| 44                                                                                              | RP11-128P9   | 8   | 8q24.22          | Gain                 | 8q24.3               | chr8:133,298,821-133,598,821  | KCNQ3                                                                                                                                            | X       |          |     | 0.039 |
| 45                                                                                              | RP11-135N5   | 17  | 17p13.3          | Loss                 | 17p12                | chr17:2,252,100-2,552,100     | KIAA0664, PAFAH1B1, METT10D, LOC284009                                                                                                           | X       |          |     | 0.016 |
| 46                                                                                              | RP11-14K13   | 5   | 5q31.3           | Loss                 | 5q31.1               | chr5:141,563,246-141,863,246  | SPRY4                                                                                                                                            | X       |          |     | 0.048 |
| 47                                                                                              | RP11-15M15   | 20  | 20q13.2          | Gain                 | 20p11.23             | chr20:51,038,260-51,338,260   | TSHZ2                                                                                                                                            | X       |          |     | 0.016 |
| 48                                                                                              | RP11-198G24  | 3   | 3q26.1           | Gain                 | 3q27                 | chr3:165,227,386-165,527,386  |                                                                                                                                                  | X       |          |     | 0.048 |
| 49                                                                                              | RP11-257O17  | 10  | 10q26.12         | Gain                 | 10q26.1              | chr10:122,233,276-122,533,276 | PPAPDC1A                                                                                                                                         | X       |          |     | 0.048 |
| 50                                                                                              | RP11-279L16  | 3   | 3p24.3           | Loss                 | 3p24.2               | chr3:15,063,521-15,363,521    | SH3BP5, CAPN7, ZFYVE20, MRPS25, NR2C2                                                                                                            | X       |          |     | 0.048 |
| 51                                                                                              | RP11-284P8   | 12  | 12q24.32         | Gain                 | 12q24.2              | chr12:125,591,353-125,891,353 |                                                                                                                                                  | X       |          |     | 0.048 |
| 52                                                                                              | RP11-29H19   | 20  | 20q13.12         | Gain                 | 20p11.23             | chr20:41,936,265-42,236,265   | JPH2, TOX2                                                                                                                                       | X       |          |     | 0.048 |
| 53                                                                                              | RP11-329O10  | 2   | 2q33.1           | Loss                 | 2q33                 | chr2:203,223,980-203,523,980  | ALS2CR8, WDR12, ICA1L, ALS2CR13                                                                                                                  | X       |          |     | 0.048 |
| 54                                                                                              | RP11-42M12   | 5   | 5q23.2           | Loss                 | 5q31.1               | chr5:127,102,362-127,402,362  |                                                                                                                                                  | X       |          |     | 0.021 |
| 55                                                                                              | RP11-44N11   | 8   | 8q24.13          | Gain                 | 8q24.1               | chr8:123,748,206-124,048,206  | ZHX2                                                                                                                                             | X       |          |     | 0.048 |
| 56                                                                                              | RP11-45B19   | 8   | 8q24.22          | Gain                 | 8q24.3               | chr8:135,508,723-135,808,723  | ZFAT, ZFAT1                                                                                                                                      | X       |          |     | 0.048 |
| 57                                                                                              | RP11-46O13   | 7   | 7q21.13          | Gain                 | 7q21.2               | chr7:88,154,518-88,454,518    | MGC26647, ZNF804B                                                                                                                                | X       |          |     | 0.048 |
| 58                                                                                              | RP11-51G15   | 10  | 10q26.11         | Gain                 | 10q26.1              | chr10:120,440,155-120,740,155 | C10orf46                                                                                                                                         | X       |          |     | 0.048 |
| 59                                                                                              | RP11-56K21   | 19  | 19p13.12         | NA                   | 19p13                | chr19:14,251,905-14,551,905   | NDUF87, GPSN2, DNAJB1, GIPC1, PTGER1, PKN1, DDX39, CD97                                                                                          | X       |          |     | 0.048 |
| 60                                                                                              | RP11-85A19   | 11  | 11p11.2          | Loss                 | 11p13                | chr11:47,949,945-48,249,945   | OR4X1, OR4X2, OR4B1, PTPRJ                                                                                                                       | X       |          |     | 0.048 |
